# Supplementary material for: Anxiety, depression and post-traumatic stress disorder management after critical illness: a UK multi-centre prospective cohort study
Source: Springer Nature journal article supplement (doi:10.1186/s13054-020-03354-y), 2020-11-02

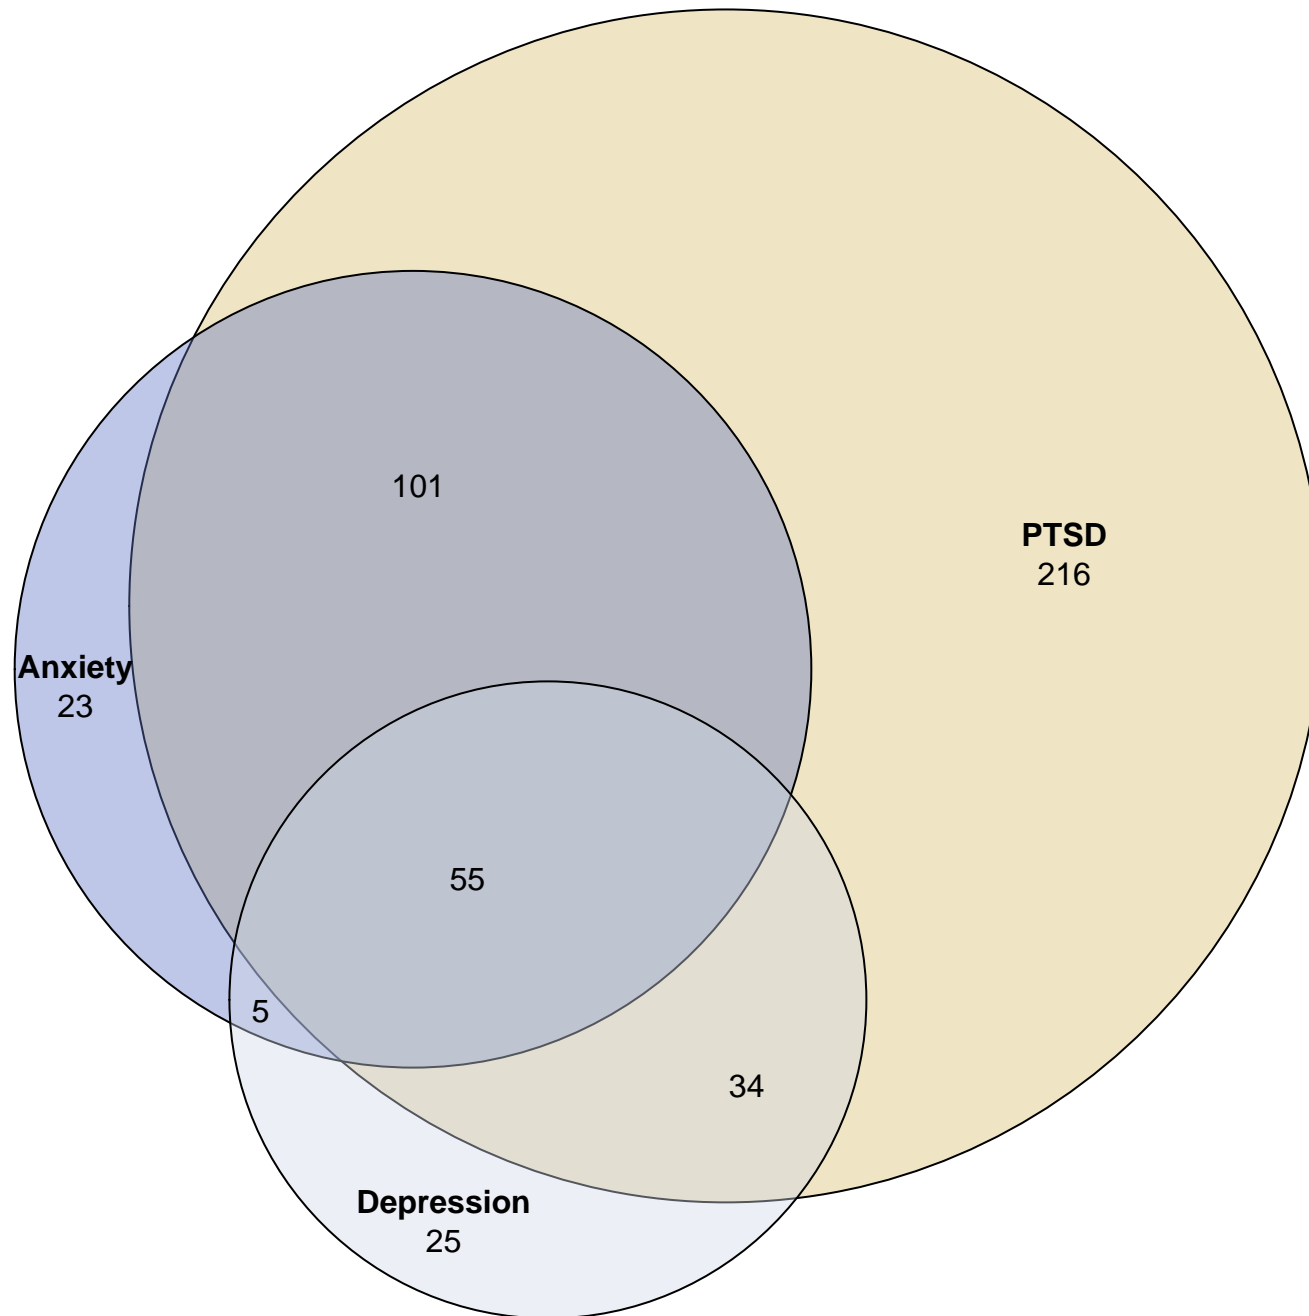

Supplement: MOESM2 [file 18546868]
