# Supplementary material for: Anxiety, depression and post-traumatic stress disorder management after critical illness: a UK multi-centre prospective cohort study
Source: Springer Nature journal article supplement (doi:10.1186/s13054-020-03354-y), 2020-11-02
Supplement: MOESM3 [file 18546868]

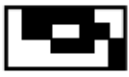

26141

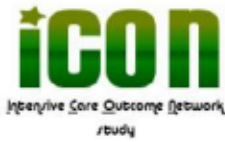

## GP QUESTIONNAIRE

G A     

Thank you for taking the time to complete this short questionnaire. Please answer all the questions to the best of your knowledge, leaving unanswerable questions blank.

Patient Details:

Following ICU admission on the 1/1/1970

Were you aware that your patient was admitted to the ICU at the ABC Hospital on the 1/1/1970?

Yes  No

Did you receive a letter from the ICON study informing you that your patient was at risk of depression / anxiety / post traumatic stress disorder?

Yes  No

If No, thank you for completing this questionnaire

Did the letter from the ICON study warning of your patient's possible depression / anxiety / post traumatic stress disorder prompt further treatment? (please tick all those that apply)

- Repeat psychological screening assessment
- Follow-up appointment within 4 weeks time
- Prescription of an antidepressant drug
- Prescription of an anxiolytic drug
- Prescription of a psychotropic drug
- Referral to mental health or social services
  - Counsellor
  - Primary care mental health worker
  - Psychology
  - Social Services
  - Psychiatry
- No further action taken as patient known to suffer from pre-existing depression, anxiety or post traumatic stress disorder
- None of the above

# Thank You!
